# Supplementary material
Source: PubMed Central journal article supplement (PMC4258501)

30 wk

46 wk

60 wk

P3- Pten<sup>+/+</sup>

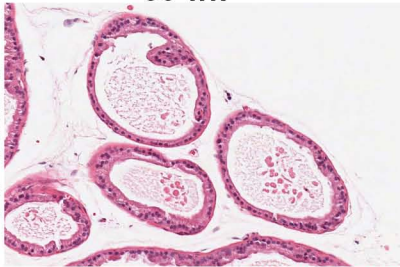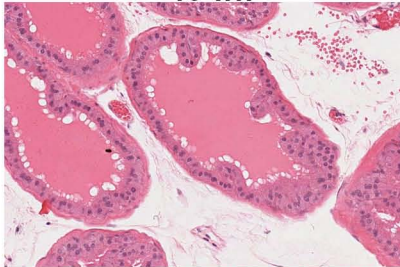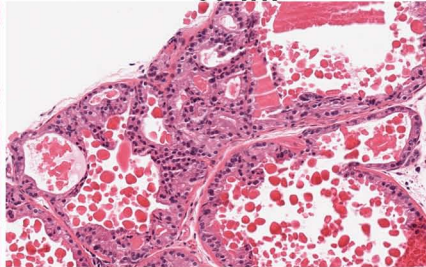

P3+ Pten<sup>+/+</sup>

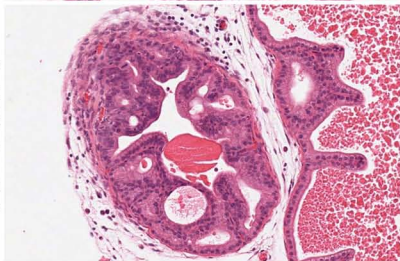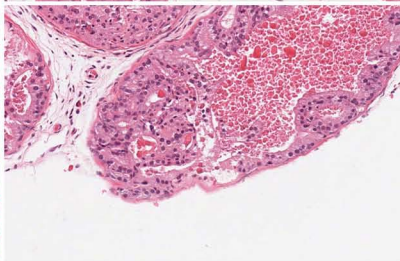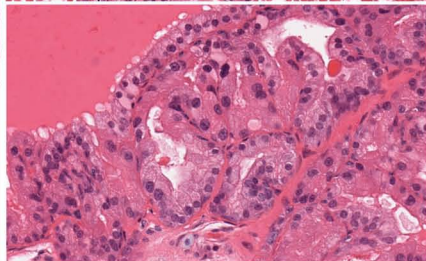

Supplement: mmc1.pdf [file mmc1.pdf]

**A**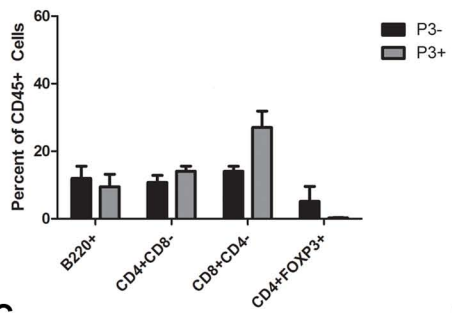**B**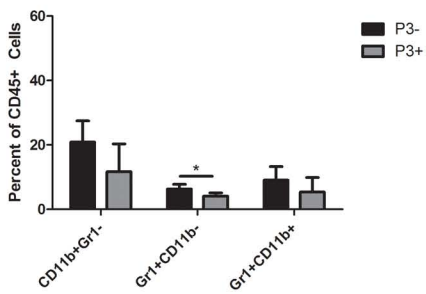**C**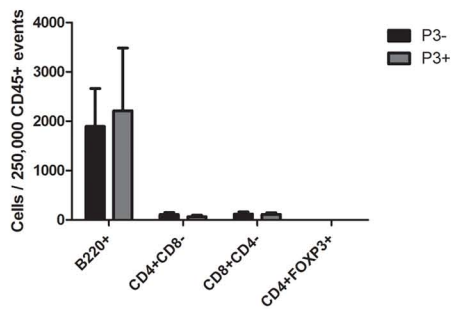**D**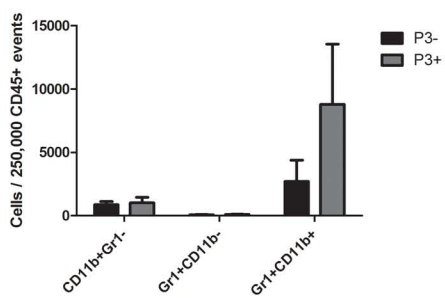

Supplement: mmc2.pdf [file mmc2.pdf]

**A**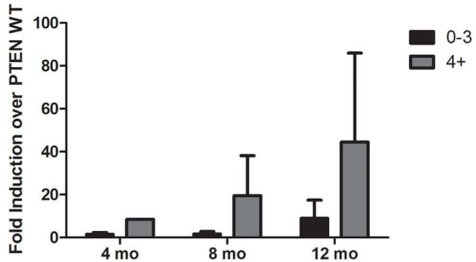**B**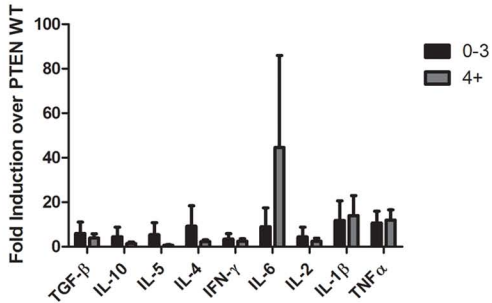

Supplement: mmc3.pdf [file mmc3.pdf]
